# Supplementary material for: Glacial δ 13 C decreases in the western South Atlantic forced by millennial changes in Southern Ocean ventilation
Source: Copernicus journal article supplement (doi:10.5194/cp-2016-59), 2016-06-20
Supplement: Supplementary file [file cp-2016-59-AC3-supplement.pdf]

We thank Referee #2 for the constructive review of our manuscript. To facilitate the discussion, we have copied his/her comments below in black and inserted our responses in green.

Review of "Glacial d13C decreases in the western South Atlantic forced by millennial changes in Southern Ocean ventilation" by Campos et al.

The authors use the d13C of planktonic foraminifera to infer variability in the d13C of DIC in surface/thermocline waters in the SW Atlantic. One strength of the paper is the comprehensive review of the modern oceanographic setting. Another is that the planktonic time series are based on a sediment core with very high sedimentation rates, allowing for high resolution reconstruction of surface ocean d13C during Heinrich Stadial 2 and 3. It is also important that the authors used two different species to reconstruct d13C (one surface dwelling and another thermocline dwelling) to account for potential biases in habitat and vital effects that could overprint changes in the d13C of DIC. Given the high resolution and replicated nature of the record, the authors clearly show that this part of the Southwest Atlantic underwent significant changes in d13C during Heinrich Stadial 2 and 3.

The primary weakness of the paper is the interpretation of the d13C and sedimentation rate results. The authors are quick to assume that their d13C records reflect the input of light carbon from the Southern Ocean and neglect other possible explanations that are well documented in the published literature.

Comment #1 - We agree that other mechanisms could have also contributed to our records. Considering this comment and similar suggestions from Referee #1 and Dr. Schmittner, we have incorporated two additional hypotheses (see below) in the revised version of our manuscript, in order to have a more thorough and balanced discussion:

i. AMOC-induced weakening of the biological pump

As shown by model experiments (e.g., Schmittner and Galbraith, 2008; Schmittner and Lund, 2015), AMOC slowdown events may cause a decrease in the global efficiency of the oceanic biological pump, being an important driver for the oceanic CO<sub>2</sub> outgassing during the last deglaciation, i.e., HS1 (but most likely also during other HS, e.g., HS3 and HS2). Two factors acting in conjunction are claimed to be responsible for the simulated weakening of the efficiency of the biological pump (Schmittner and Galbraith, 2008). First, the reduction in North Atlantic Deep Water (NADW) formation decreases the input of low preformed nutrient (high  $\delta^{13}\text{C}_{\text{DIC}}$  values) waters to the interior ocean which becomes more dominated by the high preformed nutrient southern component (low  $\delta^{13}\text{C}_{\text{DIC}}$  values) waters (e.g., Antarctic Bottom Water and Antarctic Intermediate Water). Second, the reduction of the Southern Ocean stratification induced by the decrease of salt input via NADW formation promotes the strengthening of the upwelling and subsequent sinking of high preformed nutrient (low  $\delta^{13}\text{C}_{\text{DIC}}$  values) waters to the interior ocean, thus reducing the capacity of those unutilized nutrients to sequester carbon via the biological pump.

The weakening of the biological pump would promote the accumulation of isotopically light organic carbon in the upper water column of the South Atlantic and the negative anomaly of the  $\delta^{13}\text{C}_{\text{DIC}}$  as well as of the  $\delta^{13}\text{CO}_{2\text{atm}}$  (Schmittner and Lund, 2015). This  $\delta^{13}\text{C}_{\text{DIC}}$  anomaly should be captured by the tests of planktonic foraminifera  $\delta^{13}\text{C}$  because they incorporate  $\delta^{13}\text{C}_{\text{DIC}}$  during calcification (Spero and Lea, 1996; Bemis et al., 2000). Our planktonic foraminifera  $\delta^{13}\text{C}$  records agree with this hypothesis by showing negative anomalies during HS3 and HS2. Additionally, this mechanism also provides a possible explanation for the larger negative  $\delta^{13}\text{C}$  anomaly in *G. ruber* w (mixed layer–dwelling) relative to the anomaly in *G. inflata* (permanent thermocline–dwelling).

ii. the role of air–sea gas exchange

In the original version of our manuscript (page 7, line 13) we briefly mentioned the role of air–sea gas exchange. However, we see the need to further expand this topic in order to have a more thorough and balanced discussion.

We are aware that the  $\delta^{13}\text{C}_{\text{DIC}}$  of the surface ocean can be affected by air–sea gas exchange (Oppo and Fairbanks, 1989; Charles and Fairbanks, 1990; Lynch-Stieglitz et al., 1995). Therefore, we cannot exclude the possibility that the likely decrease in  $\delta^{13}\text{CO}_{2\text{atm}}$  during AMOC slowdown events (Eggleston et al., 2016) (e.g., HS3 and HS2) could have affected the  $\delta^{13}\text{CO}_{2\text{DIC}}$  via air–sea gas exchange, especially in regions of water mass formation. The formation regions of South Atlantic Central Water and Tropical Water are areas of major ocean  $\text{CO}_2$  uptake and may contribute to the  $\delta^{13}\text{C}$  anomalies observed in our records. Additionally, since the isotopic fractionation during air–sea exchange is temperature–dependent, the weakening of the AMOC and subsequent warming of the upper subtropical South Atlantic (Barker et al. 2009; Chiessi et al. 2015) could also have contributed to the observed  $\delta^{13}\text{C}$  anomalies in our records (as suggested by Referee #2).

However, for the reasons stated below we still consider the possible role played by changes in Southern Ocean ventilation in producing our  $\delta^{13}\text{C}$  anomalies:

- i. the mechanisms that invoke the Southern Ocean as one of the  $\text{CO}_{2\text{atm}}$ –sources during the last deglaciation are based on reconstructions as well as conceptual and numerical models that, to our understanding, have not yet been negated (Toggweiler et al., 2006; Anderson et al., 2009; Sigman et al., 2010; Tschumi et al., 2011; Lee et al., 2011; Burke and Robinson, 2012);
- ii. model experiments that question the role of the Southern Ocean (e.g., Schmittner and Lund, 2015) were performed under preindustrial boundary conditions, which can significantly influence the results (e.g., Menviel et al., 2008), and do not constitute a firm negation of the Southern Ocean hypothesis.

The authors also invoke speculative connections between rainfall and sedimentation rate in the core as support for their climate interpretation, despite disagreement between the sedimentation rate and planktonic  $\delta^{13}\text{C}$  patterns.

Comment #2 - We agree that the second HS2 peak in sedimentation rate and the respective planktonic  $\delta^{13}\text{C}$  anomaly are not perfectly aligned in time. However, this apparent offset can be exclusively due to (i) the occurrence of  $^{14}\text{C}$  plateaus during HS (e.g., Sarnthein et al., 2007; Franke et al., 2008), and/or (ii) the discretized way our age model was produced in relation to the “continuous”  $\delta^{13}\text{C}$  measurements.

Finally, the authors neglect to mention much of the work at the Brazil Margin spanning the last deglaciation (including Heinrich Stadial 1) that is both relevant to their work and inconsistent with a Southern Ocean driver.

Comment #3 - We have included relevant publications from the Brazil Margin (e.g., Tessin and Lund, 2013; Lund et al. 2015) in the revised version of our manuscript together with a thorough and more balanced discussion (please see our Comment #1 above). However, the hypothesis that the Southern Ocean acts as a possible  $\text{CO}_{2\text{atm}}$ -source during HS has, to the best of our knowledge, not yet been proven incorrect and we still see the need to discuss it together with other possible explanations (please see our Comment #1 above).

Major issues:

While the prevailing view is that Southern Ocean outgassing drove surface ocean  $\delta^{13}\text{C}$  anomalies during the last deglaciation, the authors also need to reference to Andreas Schmittner’s work that shows that weakening of the AMOC can alter the preformed nutrient budget of the global ocean and therefore the efficiency of the biological pump. Weakening of the biopump would preferentially leave light carbon in the surface and create negative  $\delta^{13}\text{C}$  anomalies in multiple ocean basins (e.g. Schmittner, 2005; Schmittner and Galbraith, 2008).

Also, detailed reconstructions from the Brazil Margin show that benthic  $\delta^{13}\text{C}$  and  $\delta^{18}\text{O}$  changed late in the deglaciation, suggesting that the abyssal ocean was an unlikely source for the surface ocean anomalies during HS1 (Lund et al., 2015). Additional published records from the SE Atlantic shows a similar pattern, with a late deglacial response in the abyssal records (Waelbroeck et al., 2011; Roberts et al., 2016).

Comment #4 – Considering that the role of the weakening of the biological pump was also raised by Referee #1 and Dr. Schmittner, we have incorporated this hypothesis in the revised version of our manuscript (please see our Comment #1 above).

Our records complement the Brazil Margin depth transect (e.g., Tessin and Lund, 2013; Lund et al., 2015) with upper water column high temporal resolution data that also agree with the model output of Schmittner and Lund (2015) by suggesting a decrease in  $\delta^{13}\text{C}_{\text{DIC}}$  at the upper water column of the western South Atlantic.

However, it is worth noting that while Tessin and Lund (2013) and Lund et al. (2015), for example, focus on bottom waters, we concentrate on the upper water column. In the revised version of our manuscript, we suggest that three processes may have contributed to the negative  $\delta^{13}\text{C}$  anomalies in our records during HS3 and HS2: (i) changes in Southern Ocean ventilation; (ii) AMOC-induced weakening of the biological pump; and (iii) changes in air–sea gas exchange.

Furthermore, intermediate depth  $\text{d}13\text{C}$  reconstructions from the Brazil Margin (Oppo and Horowitz, 2000; Curry and Oppo, 2005; Lund et al., 2015) imply that AAIW and SAMW were not carriers of a light carbon signal during HS1, which is inconsistent with the mechanism invoked by Campos et al. While the authors did a commendable job summarizing the literature pertaining the modern oceanographic setting, the introductory material includes surprisingly little information from previously published work along the Brazil Margin. As a result, the introductory material is incomplete and the lack of context limits the interpretation in the discussion section.

Comment #5 - To account to this additional mechanism in the revised manuscript we have inserted a new section describing the AMOC-induced weakening of the biological pump (please see our Comment #1 above).

The other main issue with the data interpretation is that the continental hydroclimate response isn't well supported by the sedimentation rate data. While sedimentation rates peak early in HS2, at about the same time as a planktonic  $\text{d}13\text{C}$  minimum, there is a second peak in sedimentation rate after HS2 that corresponds to a broad maximum in  $\text{d}13\text{C}$ . Furthermore, there is no peak in sedimentation rate during either HS3 or HS1. Taken as a whole, the sedimentation rate data therefore do not support a continental hydroclimate connection, which perhaps isn't surprising given the many factors that can influence sedimentation rates at a single core site.

Comment #6 - Please see our Comment #2 above. Additionally, although HS3 seems not to be related to a positive anomaly in sedimentation rate at our core site, HS1 and the Younger Dryas are both related to positive anomalies (of smaller amplitude during the Younger Dryas if compared to the anomalies during HS2 and HS1). The relatively high sea-level during HS3 and the Younger Dryas if compared to the intervening period (Waelbroeck et al., 2002) may have dampened a more significant anomaly in sedimentation rates during HS3 and the Younger Dryas (e.g., Lantsch et al., 2014). This discussion has not been inserted in the revised manuscript because we have focused in HS3 and HS2.

Finally, the manuscript would benefit from inclusion of the planktonic  $\text{d}18\text{O}$  data. If there is a clear hydroclimate signal at this site, it could appear in the  $\text{d}18\text{O}$  data as intervals of unusually low  $\text{d}18\text{O}$ . The  $\text{d}18\text{O}$  data would also be informative for assessing the influence of air-sea gas exchange effects on the  $\text{d}13\text{C}$  signal. The  $\text{d}13\text{C}$  of surface ocean DIC is influenced by temperature dependent gas exchange, with a relationship of  $-0.1$  per mil per deg C of warming (Broecker and Maier-Reimer, 1992; Lynch-Stieglitz et al., 1995). While such an effect is unlikely to explain the full

magnitude of the  $\delta^{13}\text{C}$  signals, it should be included in the discussion. Model results suggest that weakening of the AMOC warms the upper subtropical South Atlantic by 2-3 deg C (Marcotte et al., 2011) which would account for up to 0.3 per mil of the planktonic  $\delta^{13}\text{C}$  anomalies.

Comment #7 - A similar topic was also raised by Referee #1. Please refer to our Comment #5 to Referee #1. Additionally, a section expanding the discussion on the possible role of air-sea gas exchange is included in the revised version of our manuscript. This mechanism is described in our Comment #1 above.

It is worthy of note that our foraminiferal  $\delta^{18}\text{O}$  data do not present clear trends during HS3 and HS2. The  $\delta^{18}\text{O}$  of planktonic foraminifera is markedly influenced by the temperature and salinity of the sea water where the tests calcified (e.g., Rohling and Cooke, 1999). The relationship between temperature and  $\delta^{18}\text{O}$  of planktonic foraminifera is inversely proportional, and the relationship between salinity and  $\delta^{18}\text{O}$  of planktonic foraminifera is directly proportional. Therefore, higher temperatures decrease foraminiferal  $\delta^{18}\text{O}$ , whereas higher salinities increase foraminiferal  $\delta^{18}\text{O}$  (e.g., Rohling and Cooke, 1999).

For periods and regions of the global ocean where an increase (decrease) in temperature is associated to a decrease (increase) in salinity, the  $\delta^{18}\text{O}$  of planktonic foraminifera will clearly record such environmental changes (e.g., Guilderson and Pak, 2007). However, for those cases where temperature and salinity increase (decrease) simultaneously, these environmental changes may not be clearly recorded in foraminiferal  $\delta^{18}\text{O}$ . The last scenario seems to be the case for the upper water column under the influence of the Brazil Current for centennial-scale events of the Holocene (Chiessi et al., 2014), as well as for HS1 (Chiessi et al., 2015), and possibly also for HS3 and HS2 (given the lack of regional SST reconstructions for HS3 and HS2).

Minor issues:

Page 6, Line 12: Here the authors should consider the possibility that weakening of the biological pump could have produced  $\delta^{13}\text{C}$  anomalies not only locally, but on a larger spatial scales.

Comment #8 - Agreed. We have changed the revised version of our manuscript accordingly.

Page 6, Line 20: It is important to mention that published mode and intermediate water records from the Brazil Margin either show a positive  $\delta^{13}\text{C}$  anomaly during HS1 or a delayed negative  $\delta^{13}\text{C}$  response that is inconsistent the light carbon being transported northward via mode and intermediate water.

Comment #9 - Agreed (please see our Comment #1 above). We have revised the manuscript accordingly. Additionally, we also incorporate two more hypotheses (i.e., (i) AMOC-induced weakening of the biological pump, and (ii) the role of air-sea gas

exchange) to the revised version of our manuscript, in order to have a more thorough and balanced discussion.

Page 7, Line 5: The authors seem to take it as a given that Southern Hemisphere westerlies drives greater upwelling of deep waters when it actuality there is limited data to support such a link. Please qualify these types of statements to reflect the limited constraints that exist.

Comment #10 – Agreed (please see our Comment #8 to Referee #1). We have revised our manuscript accordingly.

Page 7, Line 9: See comments above that published intermediate depth records from the Brazil Margin don't show clear negative carbon isotope anomalies during HS1, which is relevant to whether a similar process occurred during HS2 and HS3.

Comment #11 - Agreed (please see our Comment #1 above). We have revised our manuscript accordingly. Additionally we also incorporate two more hypotheses (i.e., (i) AMOC-induced weakening of the biological pump, and (ii) the role of air-sea gas exchange) to the revised version of our manuscript, in order to have a more thorough and balanced discussion.

Figure 4: If the authors are going to pursue the sedimentation rate-hydroclimate link, then the sedimentation rates should also be included in this figure for comparison to the  $\delta^{13}\text{C}$ . The  $\delta^{18}\text{O}$  records should also be included to assess the potential impact of sea surface temperature on  $\delta^{13}\text{C}$ .

Comment #12 - Agreed. We have inserted the sedimentation rate record in Figure 5 of the revised version of our manuscript. Regarding the  $\delta^{18}\text{O}$  data, please refer to our Comment #5 to Referee #1 and our Comment #7 above.

Figure 5: There are several time series in this plot that aren't essential for the discussion, such as the Iberian Margin SST record, the EDML  $\delta^{18}\text{O}$  time series, and the Siple Dome  $\text{CO}_2$ .

Comment #13 - We agree that removing the  $\delta^{18}\text{O}$  EDML curve (EPICA Community Members, 2006) would not harm the main focus of our manuscript. In addition, we have also removed the Taylor Dome  $\delta^{13}\text{CO}_{2\text{atm}}$  curve (Smith et al., 1999) for the reason mentioned in our Comment #7 to Referee #1.

However, we would prefer not to delete the following curves: (i) the Iberian Margin SST curve (Bard, 2002) because it shows a “w-structure” during HS2 that gives support to the proposed “w-structure” of HS2; and (ii) the Siple Dome  $\text{CO}_{2\text{atm}}$  (Ahn and Brook, 2014) due to its fundamental importance to our manuscript (please see our Comment #6 to Referee #1).

## References



Ahn, J. and Brook, E. J.: Siple Dome ice reveals two modes of millennial CO<sub>2</sub> change during the last ice age, *Nature*, 5, doi:10.1038/ncomms4723, 2014.

Anderson, R. F., Ali, S., Bradtmiller, L. I., Nielsen, S. H. H., Fleisher, M. Q., Anderson, B. E., and Burckle, L. H.: Wind-Driven Upwelling in the Southern Ocean and the Deglacial Rise in Atmospheric CO<sub>2</sub>, *Science*, 323, 1443-1448, doi:10.1126/science.1167441, 2009.

Bard, E.: Climate shock: Abrupt changes over millennial time scales, *Phys Today*, 55, 32-38, 2002.

Barker, S., Diz, P., Vautravers, M. J., Pike, J., Knorr, G., Hall, I. R., and Broecker, W. S.: Interhemispheric Atlantic seesaw response during the last deglaciation, *Nature*, 457, 1097-1102, doi:10.1038/nature07770, 2009.

Bemis, B. E., Spero, H. J., Lea, D. W., and Bijma, J.: Temperature influence on the carbon isotopic composition of *Globigerina bulloides* and *Orbulina universa* (planktonic foraminifera), *Mar Micropaleontol*, 38, 213–228, 2000.

Burke, A., and Robinson, L. F.: The Southern Ocean's role in carbon exchange during the last deglaciation, *Science*, 335, 557–561, 2012.

Charles, C. D., and Fairbanks, R. G.: Glacial to interglacial changes in the isotopic gradients of Southern Ocean surface water, in *Geological History of the Polar Oceans: Arctic Versus Antarctic*, edited by U. Bleil and J. Thiede, pp. 519-538, Kluwer Academic, Norwell, Mass., 1990.

Chiessi, C. M., Mulitza, S., Groeneveld, J., Silva, J. B., Campos, M. C., and Gurgel, M. H. C.: Variability of the Brazil Current during the late Holocene, *Palaeogeogr Palaeoclimatol*, 415, 28-36, 2014.

Chiessi, C. M., Mulitza, S., Mollenhauer, G., Silva, J. B., Groeneveld, J., and Prange, M.: Thermal evolution of the western South Atlantic and the adjacent continent during Termination 1, *Clim Past*, 11, 915-929, doi:10.5194/cp-11-915-2015, 2015.

Eggleston, S., Schmitt, J., Bereiter, B., Schneider, R., and Fischer, H.: Evolution of the stable carbon isotope composition of atmospheric CO<sub>2</sub> over the last glacial cycle, *Paleoceanography*, 10.1002/2015PA002874, 2016.

EPICA Community Members: One-to-one coupling of glacial climate variability in Greenland and Antarctica, *Nature*, 444, 195-198, doi:10.1038/nature05301, 2006.

Franke, J., Paul, A., and Schulz, M.: Modeling variations of marine reservoir ages during the last 45 000 years, *Clim Past*, 4, 2, 125-136, doi:10.5194/cp-4-125-2008, 2008.

Guilderson, T. P., and Pak, D. K.: Salinity proxies  $\delta^{18}\text{O}$ . In: *Encyclopedia Of Quaternary: Paleoceanography, Physical and Chemical proxies*. Elsevier: Amsterdam, p. 1766-1775, 2007.

Lantzsch, H., Hanebuth, T. J. J., Chiessi, C. M., Schwenk, T., and Violante, R. A.: The high-supply, current-dominated continental margin of southeastern South America during the late Quaternary, *Quaternary Res*, 81, 339-354, doi:10.1016/j.yqres.2014.01.003, 2014.

Lee, S.-Y., Chiang, J. C. H., Matsumoto, K., and Tokos, K. S.: Southern Ocean wind response to North Atlantic cooling and the rise in atmospheric  $\text{CO}_2$ : Modeling perspective and paleoceanographic implications, *Paleoceanography*, 26, PA1214, doi:10.1029/2010PA002004, 2011.

Lund, D. C., Tessin, A. C., Hoffman, J. L., and Schmittner, A.: Southwest Atlantic water mass evolution during the last deglaciation, *Paleoceanography*, 10.1002/2014PA002657, 2015.

Lynch-Stieglitz, J., Stocker, T. F., Broecker, W. S., and Fairbanks, R. G.: The influence of air-sea exchange on the isotopic composition of oceanic carbon: Observations and modeling, *Global Biogeochem Cy*, 9 (4), 653-665, 1995.

Menviel, L., Timmermann, A., Mouchet, A., and Timm, O.: Meridional reorganizations of marine and terrestrial productivity during Heinrich events, *Paleoceanography*, 23, PA1203, doi:10.1029/2007PA001445, 2008.

Oppo, D. W., and Fairbanks, R. G.: Carbon isotope composition of tropical surface water during the past 22,000 years, *Paleoceanography*, 4, 333-351, doi:10.1029/PA004i004p00333, 1989.

Rohling, E. J., and Cooke, E.: Stable oxygen and carbon isotopes in foraminiferal carbonate shells. In: Sen Gupta, B. K.: *Modern Foraminifera*. Kluwer Academic Publishers, p. 239-259, 1999.

Sarnthein, M., Grootes, P. M., Kennett, J. P., and Nadeau, M.-J.:  $^{14}\text{C}$  reservoir ages show deglacial changes in ocean currents and carbon cycle. In: *Ocean Circulation: Mechanisms and Impacts - Past and Future Changes of Meridional Overturning* (eds A. Schmittner, J. C. H. Chiang and S. R. Hemming), American Geophysical Union, Washington, D. C.. doi: 10.1029/173GM13, 2007.

Schmittner, A., and Galbraith, E. D.: Glacial greenhouse-gas fluctuations controlled by ocean circulation changes, *Nature*, 456, doi:10.1038/nature07531, 2008.

Schmittner, A., and Lund, D. C.: Early deglacial Atlantic overturning decline and its role in atmospheric  $\text{CO}_2$  rise inferred from carbon isotopes ( $\delta^{13}\text{C}$ ), *Clim Past*, 11, 135-152, doi:10.5194/cp-11-135-2015, 2015.



Sigman, D. M., Hain, M. P., and Haug, G. H.: The polar ocean and glacial cycles in atmospheric CO<sub>2</sub> concentration, *Nature*, 466, 47–55, 2010.

Smith, H. J., Fischer, H., Wahlen, M., Mastroianni, D., and Deck, B.: Dual modes of the carbon cycle since the Last Glacial Maximum, *Nature*, 400, 248–250, doi:10.1038/22291, 1999.

Spero, H. J., and Lea, D. W.: Experimental determination of stable isotope variability in *Globigerina bulloides*: Implications for paleoceanographic reconstruction, *Mar Micropaleontol*, 28, 231–246, 1996.

Tessin, A. C., and Lund, D. C.: Isotopically depleted carbon in the mid-depth South Atlantic during the last deglaciation, *Paleoceanography*, 28, 296–306, 2013.

Toggweiler, J. R., Russell, J. L., and Carson, S. R.: Midlatitude westerlies, atmospheric CO<sub>2</sub>, and climate change during the ice ages, *Paleoceanography*, 21, PA2005, 2006.

Tschumi, T., Joos, F., Gehlen, M., and Heinze, C.: Deep ocean ventilation, carbon isotopes, marine sedimentation and the deglacial CO<sub>2</sub> rise, *Clim Past*, 7, 771–800, doi:10.5194/cp-7-771-2011, 2011.

Waelbroeck, C., Labeyrie, L., Michel, E., Duplessy, J. C., McManus, J. F., Lambeck, K., Balbon, E., and Labracherie, M.: Sea-level and deep water temperature changes derived from benthic foraminifera isotopic records, *Quaternary Sci Rev*, 21, 295–305, 2002.
